# Supplementary material
Source: publisher figshare collection journal article supplement (https://acs.figshare.com/ndownloader/files/12974189)
Supplement: Supplementary file 1 [file 12974189]

## Supplementary Information

### Tracing hematopoietic progenitor cell neutrophilic differentiation via Raman spectroscopy

Ji Sun Choi<sup>1,2†</sup>, Yelena Ilin<sup>3†</sup>, Mary L. Kraft<sup>3,4</sup>, Brendan A. C. Harley<sup>3,5\*</sup>

<sup>1</sup> Carle Illinois College of Medicine

<sup>2</sup> Beckman Institute for Advanced Science and Technology

<sup>3</sup> Department of Chemical and Biomolecular Engineering

<sup>4</sup> Department of Chemistry

<sup>5</sup> Carl R. Woese Institute for Genomic Biology

University of Illinois at Urbana-Champaign

Urbana, IL 61801

<sup>†</sup>Co-first authors

#### **\*Corresponding Author:**

B.A.C. Harley

Dept. of Chemical and Biomolecular Engineering

Carl R. Woese Institute of Genomic Biology

University of Illinois at Urbana-Champaign

110 Roger Adams Laboratory

600 S. Mathews Ave.

Urbana, IL 61801

Phone: (217) 244-7112

Fax: (217) 333-5052

e-mail: [bharley@illinois.edu](mailto:bharley@illinois.edu)

## **Supplementary Materials and Methods**

### ***Nuclear staining area quantification***

Live 32D cells were stained with Hoechst 33342 dye (1:500 dilution) and imaged with Olympus IX81 inverted fluorescence microscope to visualize their nucleus. Resulting brightfield and fluorescence images were processed with ImageJ to determine the total area and the nuclear area of each cell to calculate the nucleus-to-cytoplasm ratio. The area of the cytoplasm was calculated by subtracting the nucleus area from the total cell area.<sup>1</sup>

### ***Cytospin and Wright's stain***

32D cells were collected with a cell scraper, spun down, and washed twice with warm PBS (37°C). The cells were then resuspended with ice cold 70% ethanol dropwise in a 15-mL polypropylene tube for fixation and stored at 4°C until analysis. Stored samples were cytospinned and Wright stained at the Veterinary Diagnostic Laboratory at the University of Illinois at Urbana-Champaign College of Veterinary Medicine. Wright stained cells were imaged with a light microscope for visualization.

### ***Flow cytometric analysis for quantifying Gr-1 expression***

32D cells were collected with a cell scraper, spun down, washed twice with warm PBS (37°C), and resuspended in ice cold PBS supplemented with 2% FBS and 1% Pen/Strep (PBS/FBS buffer). Cells were then incubated with Fc receptor blocking antibody (CD16/CD32) to prevent nonspecific binding followed by incubating with FITC-conjugated Gr-1 (Ly-6G/C) antibody (1:200 dilution; eBiosciences, San Diego, CA).<sup>2</sup> Propidium iodide (Thermo Fisher Scientific Inc.,

Waltham, MA) was used to exclude dead cells. Labeled cells were analyzed with BD LSR Fortessa Flow Cytometry Analyzer (BD Biosciences, San Jose, CA) to quantify Gr-1 expression.

### ***Cell cycle analysis***

32D cells were collected with a cell scraper, spun down, and washed twice with warm PBS (37°C). The cells were then resuspended with ice cold 70% ethanol dropwise in a 15-mL polypropylene tube for fixation and stored at 4°C until analysis. For staining, stored samples were spun down (200g, 10 minutes, 4°C), washed with ice cold PBS, and resuspended in Triton X-100/propidium iodide solution.<sup>3</sup> This solution was prepared by adding 0.40 mL of 500 µg/mL propidium iodide to 10 mL of 0.1% Triton X-100 solution. Stained cells were analyzed with BD LSR Fortessa Flow Cytometry Analyzer (BD Biosciences, San Jose, CA). Resulting flow cytometric data was analyzed with FCS Express software (De Novo Software, Glendale, CA) to perform cell cycle analysis.

### ***Cell viability quantification***

32D cell viability was assessed by staining cells with Live/Dead Cell Viability Assay (Life Technologies, Grand Island, NY) according to manufacturer's instructions and imaging them with Olympus BX51 upright fluorescence microscope (Olympus Corp., Waltham, MA).

### ***BCA assay***

Cells were washed twice with PBS and pelleted by centrifugation at 1800 x g for 5 minutes. RIPA buffer (150 mM NaCl, 1.0% IGEPAL<sup>®</sup> CA-630, 0.5% sodium deoxycholate, 0.1% SDS,

50 mM Tris, pH 8.0) was added to the cell pellets, followed by vortexing for 20 seconds and centrifugation at 8000g for 10 minutes, for cell lysis. Cellular protein concentration was measured by a BCA protein assay kit according to manufacturer's instructions (ThermoFisher Scientific, Waltham, MA).

### ***PLD assay***

To quantify total cellular phospholipid, cellular lipid extracts were prepared via the Bligh and Dyer method.<sup>4</sup> Briefly, 2 mL methanol and 1 mL chloroform were added to each cell pellet. The cell pellet was vortexed, sonicated for 15 minutes, allowed to sit at room temperature for 1 hour, and centrifuged at 1800 x g for 5 minutes. The cell pellet was discarded. 1 mL of chloroform and 1 mL of 18 mΩ water was added to the supernatant, followed by vortexing and centrifugation at 1800 x g for 5 minutes. The chloroform layer was recovered and dried under nitrogen gas. The lipid extracts were re-dissolved in 1:1 PLD/cholesterol buffer, vortexed, and sonicated for 15 minutes. Cellular phospholipid concentration was measured by a phospholipase D (PLD) assay according to manufacturer's instructions (Sigma Aldrich, St. Louis, MO).

## Supplemental Figures

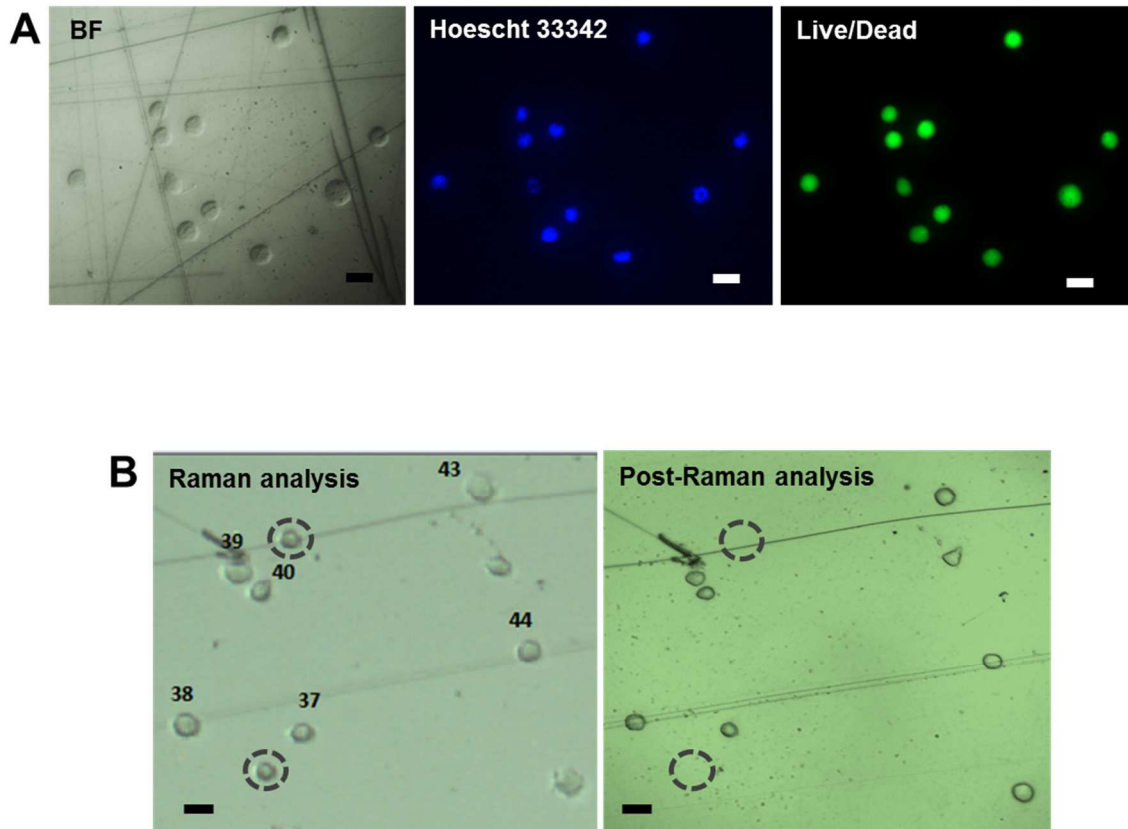

**Figure S1. Effects of laser irradiation during Raman spectroscopic analysis.**

Immediately following Raman spectroscopic analysis, 32D cells were stained in situ and imaged with an upright fluorescence microscope. Representative images of 32D cells are shown here. Scale bar: 10  $\mu\text{m}$ . (A) No significant changes in cell viability were observed within at least 3-hours of irradiation. Nucleus stain Hoechst 33342 (Blue) was used to visualize nuclear shape. Live/Dead stain was used to visualize cell viability (Green: Live, Red: Dead, Composite image is shown here, and there were no dead cells in the field of view). (B) Some cells detached during the staining and imaging step post-Raman analysis. Detached cells are shown in dashed circles. Left: Brightfield image taken during the Raman spectroscopic analysis. Right: Brightfield image taken during the imaging step post-Raman analysis. Some cells have detached during staining and imaging.

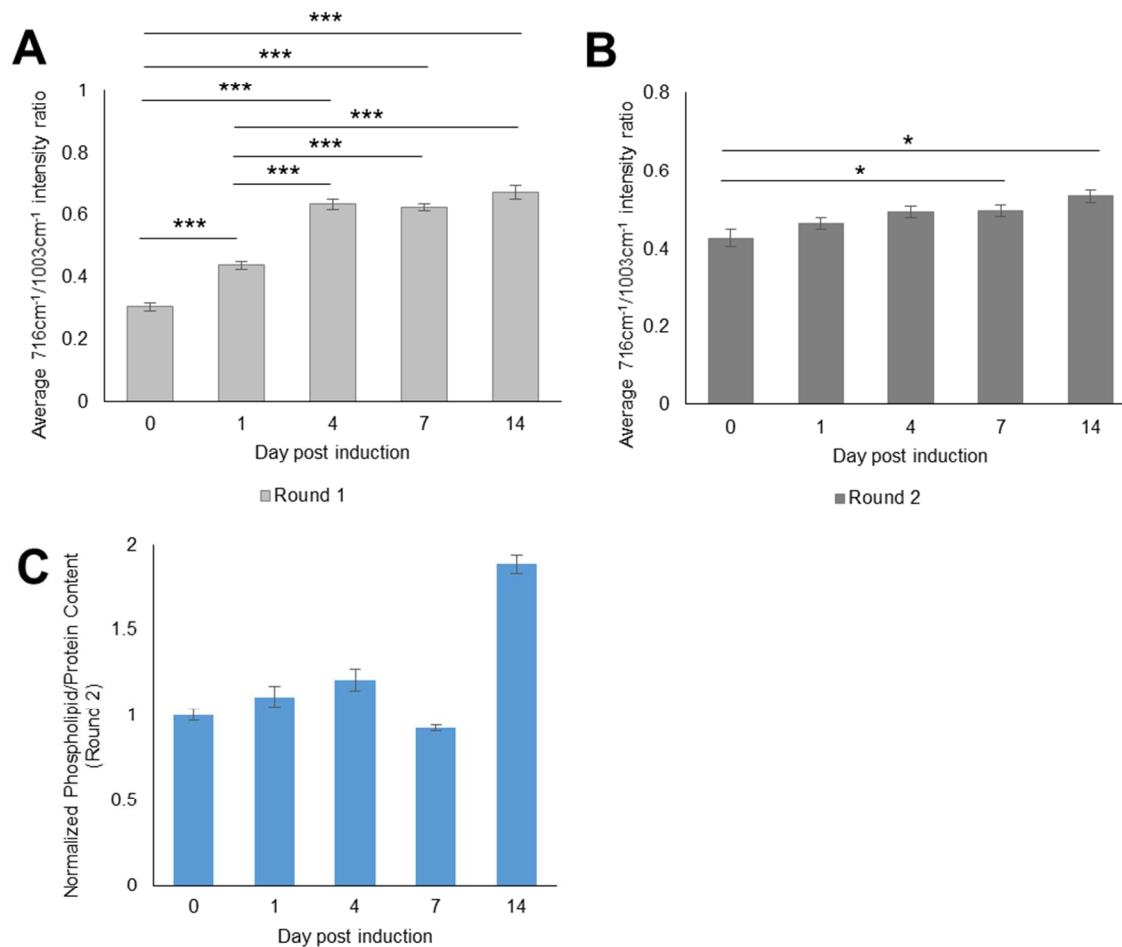

**Figure S2. Changes in cellular lipid content during neutrophilic differentiation.**

(A, B) Average ratios of choline (716 cm<sup>-1</sup>) to phenylalanine (1003 cm<sup>-1</sup>) Raman peak intensities on days 0, 1, 4, 7, and 14 post-induction from two independent rounds of neutrophilic differentiation (Round 1 and 2). \*:  $p < 0.05$ . \*\*\*:  $p < 0.001$ . (C) For Round 2, the ratio of total cellular phospholipid to protein content was determined using a PLD and BCA assay. Phospholipid-to-protein levels were normalized to Day 0 values. Errors represent standard deviations from the technical replicates.

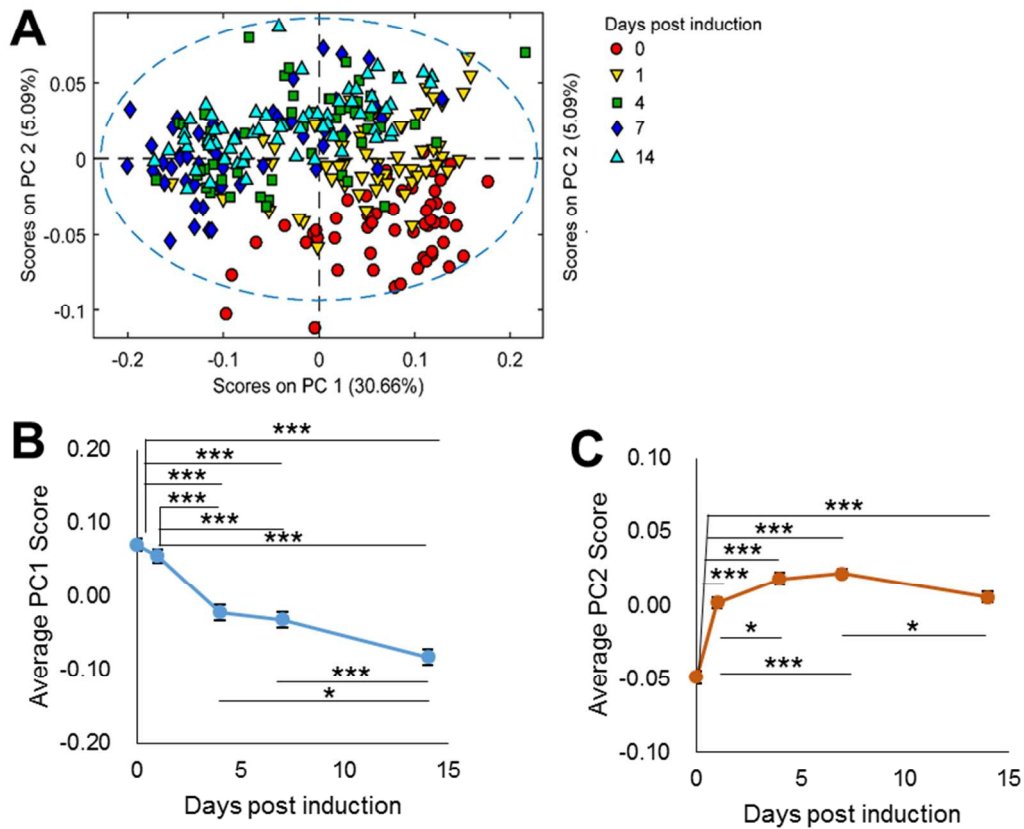

**Figure S3. PCA of 32D cells grouped by day of analysis during neutrophilic differentiation.**

(A) PCA of 32D cell spectra when cells were grouped by the day of analysis rather than their nucleus shape. In this analysis, cells appeared more broadly distributed. (B) Average PC 1 scores still decreased with cell maturation. (C) Average PC 2 scores increased and plateaued over time.

\*:  $p < 0.05$ . \*\*\*:  $p < 0.001$ .

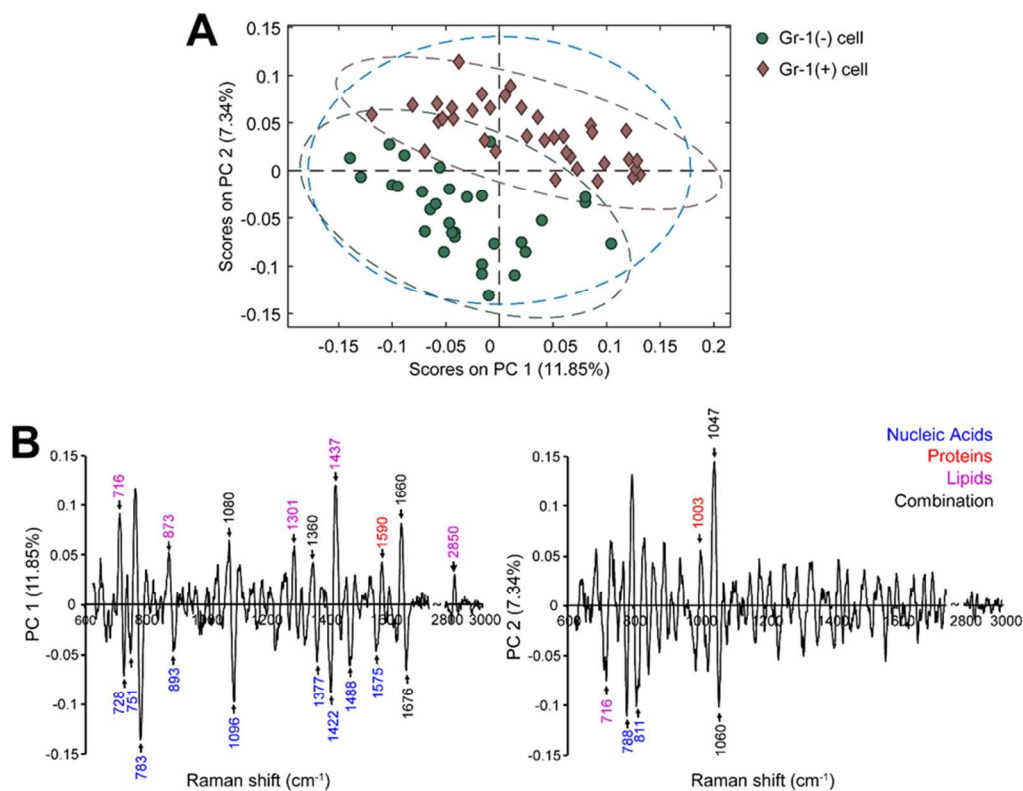

**Figure S4. PCA of 32D cells sorted based on their Gr-1 expression.**

(A) PCA was performed on 32D cells sorted based on their Gr-1 expression. Gr-1(-) and Gr-1(+) 32D cells from day 0 and 14 post-induction were collected using fluorescence-activated cell sorting (FACS). (B) The corresponding PC 1 and PC 2 score plots are shown. The most significant and relevant peaks are labeled based on the peak wavenumber and the corresponding biomolecule type (nucleic acid, protein, lipid, or a combination of biomolecules).



## Supplemental Tables

**Table S1.** Raman peak assignments.

| Raman Shift<br>(cm <sup>-1</sup> ) | Nucleic acids                     | Proteins                                      | Lipids                         | Carbohydrates |
|------------------------------------|-----------------------------------|-----------------------------------------------|--------------------------------|---------------|
| 645                                |                                   | C-C twist Tyr                                 |                                |               |
| 682                                | G ring br.                        |                                               |                                |               |
| 701                                |                                   |                                               | Cholesterol ring str.          |               |
| 716                                |                                   |                                               | Choline                        |               |
| 728                                | A ring br.                        | Ring br. Trp                                  | C-N str.                       |               |
| 751                                | T ring br.                        | Trp.                                          |                                |               |
| 783                                | U, C, T ring br.                  |                                               |                                |               |
| 788                                | O-P-O str. DNA                    |                                               |                                |               |
| 811                                | O-P-O str. RNA                    |                                               | O-P-O                          |               |
| 828                                | O-P-O str.                        | Out of plane ring br. Tyr                     |                                |               |
| 853                                |                                   | Ring br. Tyr                                  |                                |               |
| 873                                |                                   |                                               | C <sub>2</sub> -C <sub>1</sub> |               |
| 893                                | BK, deoxyrib.                     |                                               |                                |               |
| 937                                |                                   | C-C BK str. $\alpha$ helix                    |                                |               |
| 972                                |                                   |                                               | C-C                            |               |
| 1003                               |                                   | Sym. ring br. Phe                             |                                |               |
| 1047                               |                                   | Culture media (undefined)                     |                                |               |
| 1080                               |                                   | C-N str.                                      | Chain C-C str.                 | C-O str.      |
| 1096                               | PO <sub>2</sub> <sup>-</sup> str. |                                               | Chain C-C str.                 | C-C str.      |
| 1128                               |                                   | C-N str.                                      | Chain C-C str.                 |               |
| 1180                               |                                   | C-H in-plane bend Tyr                         |                                |               |
| 1208                               | C, T                              | C-C <sub>6</sub> H <sub>5</sub> str. Phe, Trp |                                |               |
| 1285                               |                                   | Amide III $\alpha$ helix                      |                                |               |
| 1296                               |                                   | Amide III, CH def.                            | CH <sub>2</sub> twist          |               |
| 1312                               |                                   | CH def.                                       |                                |               |
| 1342                               | A, G                              | CH def.                                       |                                |               |
| 1367                               |                                   |                                               | CH <sub>3</sub> sym str.       |               |
| 1377                               | A, G, T                           |                                               |                                |               |
| 1422                               | A, G                              |                                               |                                |               |
| 1437                               |                                   |                                               | CH def.                        |               |
| 1449                               |                                   | CH def.                                       | CH def.                        | CH def.       |
| 1488                               | A, G                              |                                               |                                |               |
| 1514                               | A                                 |                                               |                                |               |
| 1550                               |                                   | Amide II $\alpha$ helix                       |                                |               |
| 1575                               | A, G                              |                                               |                                |               |
| 1608                               |                                   | C=C Phe, Tyr                                  |                                |               |
| 1617                               |                                   | C=C Tyr, Trp                                  |                                |               |
| 1626-1640                          |                                   | Amide I $\beta$ sheet                         |                                |               |
| 1660                               |                                   | Amide I $\alpha$ helix                        | C=C str.                       |               |
| 1669-1690                          |                                   | Amide I turn                                  |                                |               |
| 1676                               | T                                 |                                               |                                |               |
| 2850                               |                                   |                                               | CH <sub>2</sub> sym str.       |               |
| 2935                               |                                   | CH <sub>3</sub> sym str.                      | CH <sub>3</sub> sym str.       |               |

Abbreviations: Phe: phenylalanine, Trp: tryptophan, Tyr: tyrosine; A, T, G, C: adenine, thymine, guanine, cytosine; sym: symmetric, asym: asymmetric, def: deformation, bk: backbone, ring br: ring breathing. Assignments are based on references.<sup>5-11</sup> Several measured peaks were shifted slightly from reference peaks, likely due to misalignment or limit in spectral resolution.

**Table S2.** A summary of PLS-DA models built for myeloid cell discrimination.

| Model # | PLS-DA Model/Test                                                                                                                    | Sensitivity calibration/CV/ prediction | Specificity calibration/CV/ prediction | Prediction classification error |
|---------|--------------------------------------------------------------------------------------------------------------------------------------|----------------------------------------|----------------------------------------|---------------------------------|
| 1       | Calibration and prediction: myeloblasts and neutrophils from differentiation rounds 1,2,3 (split using venetian blinds)              | 0.965, 0.966                           | 0.966, 0.965                           | 11.3%                           |
|         |                                                                                                                                      | 0.912, 0.879                           | 0.879, 0.912                           |                                 |
|         |                                                                                                                                      | 0.893, 0.882                           | 0.882, 0.893                           |                                 |
| 2       | Calibration: myeloblasts and neutrophils from round 2<br><br>Prediction: myeloblasts and neutrophils from rounds 1, 3                | 0.887, 0.887                           | 0.887, 0.887                           | 15.3%                           |
|         |                                                                                                                                      | 0.849, 0.868                           | 0.868, 0.849                           |                                 |
|         |                                                                                                                                      | 0.938, 0.756                           | 0.756, 0.938                           |                                 |
| 3       | Calibration: Sorted Gr-1(-) and Gr-1(+) cells<br><br>Prediction: myeloblasts and neutrophils from differentiation rounds 1,2,3       | 0.906, 0.938                           | 0.938, 0.906                           | 16.0%                           |
|         |                                                                                                                                      | 0.875, 0.938                           | 0.938, 0.875                           |                                 |
|         |                                                                                                                                      | 0.776, 0.904                           | 0.904, 0.776                           |                                 |
| 4       | Calibration and prediction: myeloblasts, promyelocytes/metamyelocytes, band cells, and neutrophils from differentiation rounds 1,2,3 | 0.793, 0.704, 0.771, 0.803             | 0.782, 0.781, 0.729, 0.830             | 23.8%                           |
|         |                                                                                                                                      | 0.793, 0.278, 0.343, 0.724             | 0.782, 0.669, 0.681, 0.755             | 43.5%                           |
|         |                                                                                                                                      | 0.797, 0.407, 0.371, 0.882             | 0.727, 0.724, 0.751, 0.743             | 43.9%                           |
|         |                                                                                                                                      |                                        |                                        | 18.8%                           |

## Supplemental References

- (1) Khan, A. Z.; Utheim, T. P.; Jackson, C. J.; Reppe, S.; Lyberg, T.; Eidet, J. R. *Microscopy and Microanalysis* **2016**, 22, 612-620.
- (2) Cialla-May, D.; Zheng, X. S.; Weber, K.; Popp, J. *Chem Soc Rev* **2017**, 46, 3945-3961.
- (3) Pozarowski, P.; Darzynkiewicz, Z. In *Checkpoint Controls and Cancer: Volume 2: Activation and Regulation Protocols*, Schönthal, A. H., Ed.; Humana Press: Totowa, NJ, 2004, pp 301-311.
- (4) Bligh, E. G.; Dyer, W. J. *Canadian Journal of Biochemistry and Physiology* **1959**, 37, 911-917.
- (5) Aksoy, C.; Severcan, F. *Spectroscopy: An International Journal* **2012**, 27.
- (6) Chan, J. W.; Taylor, D. S.; Zwerdling, T.; Lane, S. M.; Ihara, K.; Huser, T. *Biophys J* **2006**, 90, 648-656.
- (7) Czamara, K.; Majzner, K.; Pacia, M. Z.; Kochan, K.; Kaczor, A.; Baranska, M. *Journal of Raman Spectroscopy* **2014**, 46, 4-20.
- (8) Krafft, C.; Neudert, L.; Simat, T.; Salzer, R. *Spectrochimica Acta Part A: Molecular and Biomolecular Spectroscopy* **2005**, 61, 1529-1535.
- (9) Notingher, I.; Verrier, S.; Haque, S.; Polak, J. M.; Hench, L. L. *Biopolymers* **2003**, 72, 230-240.
- (10) Puppels, G. J.; Garritsen, H. S.; Segers-Nolten, G. M.; de Mul, F. F.; Greve, J. *Biophys J* **1991**, 60, 1046-1056.
- (11) Zinin Pavel, V.; Misra, A.; Kamemoto, L.; Yu, Q.; Hu, N.; Sharma Shiv, K. *Journal of Raman Spectroscopy* **2009**, 41, 268-274.
